# Supplementary material for: Nitrogen-doped Carbon-coated Al 2 O 3 supported Co 3 O 4 nanoparticles for Fischer-Tropsch synthesis: Boosting durability and Olefins selectivity
Source: Research Square preprint supplement (doi:10.21203/rs.3.rs-7767967/v1), 2025-10-23
Supplement: Supplementary file 1 [file 35fdccc8ca8605736cd9c5d7.docx]

**Supplementary information**

Nitrogen-doped Carbon-coated Al2O3 supported Co3O4 nanoparticles for Fischer-Tropsch synthesis: Boosting durability and Olefins selectivity

Lili Wu • Shuying Ren • Chengchao Liu

Key Laboratory of Catalysis and Energy Materials Chemistry of Ministry of Education & Hubei Key Laboratory of Catalysis and Materials Science, South-Central Minzu University, Wuhan 430074, China.

- Chengchao Liu
  liuchchao@scuec.edu.cn


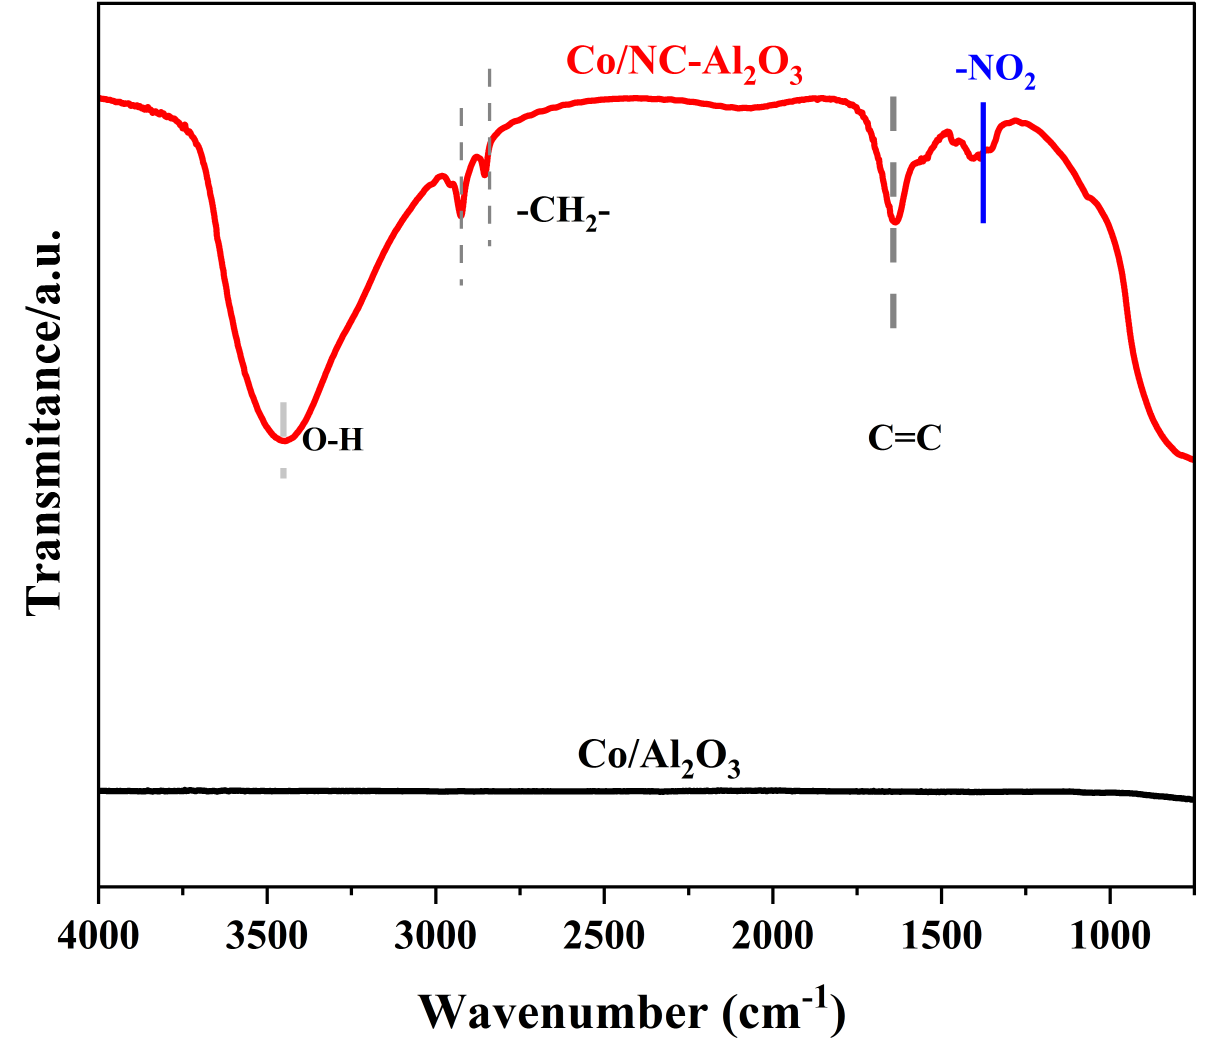


**Fig. S1** FT-IR spectra of the resh catalysts


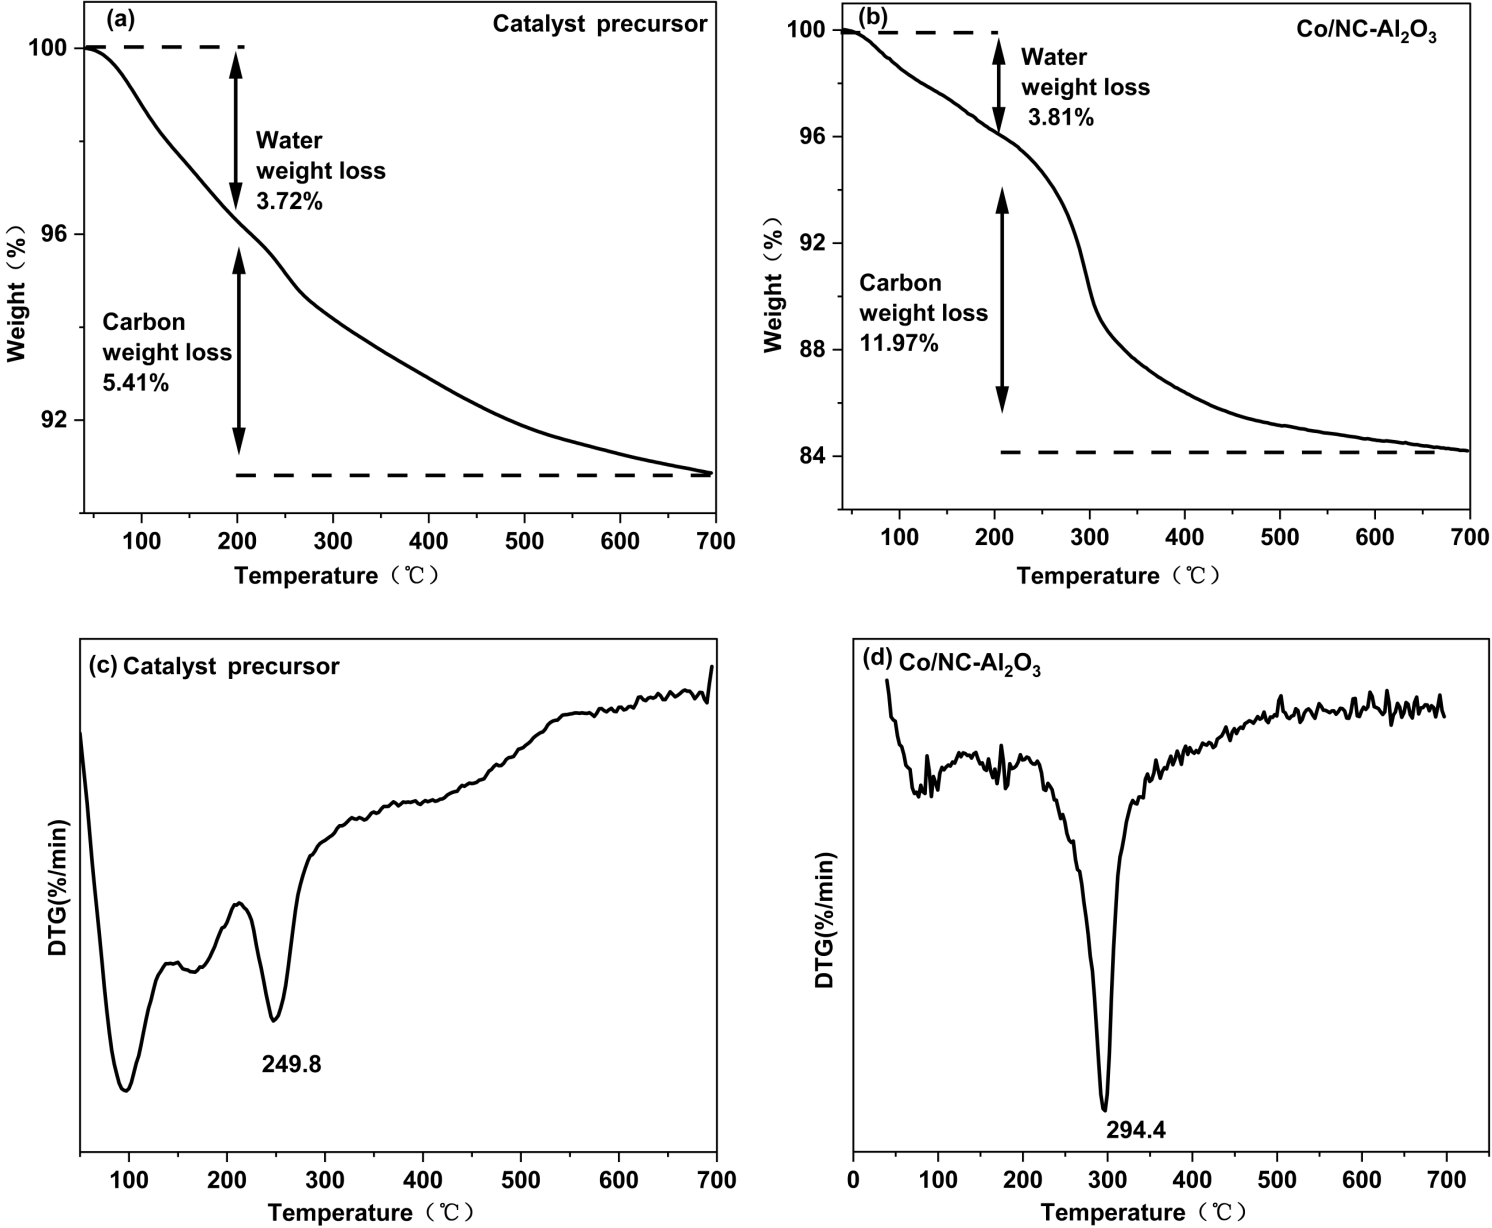


**Fig. S2** TG curves (in air atmosphere). **a** Catalyst precursor. **b** Co/NC-Al2O3 catalyst. DTG curves in air atmosphere. **c** the catalyst precursor. **d** Co/NC-Al2O3 catalyst


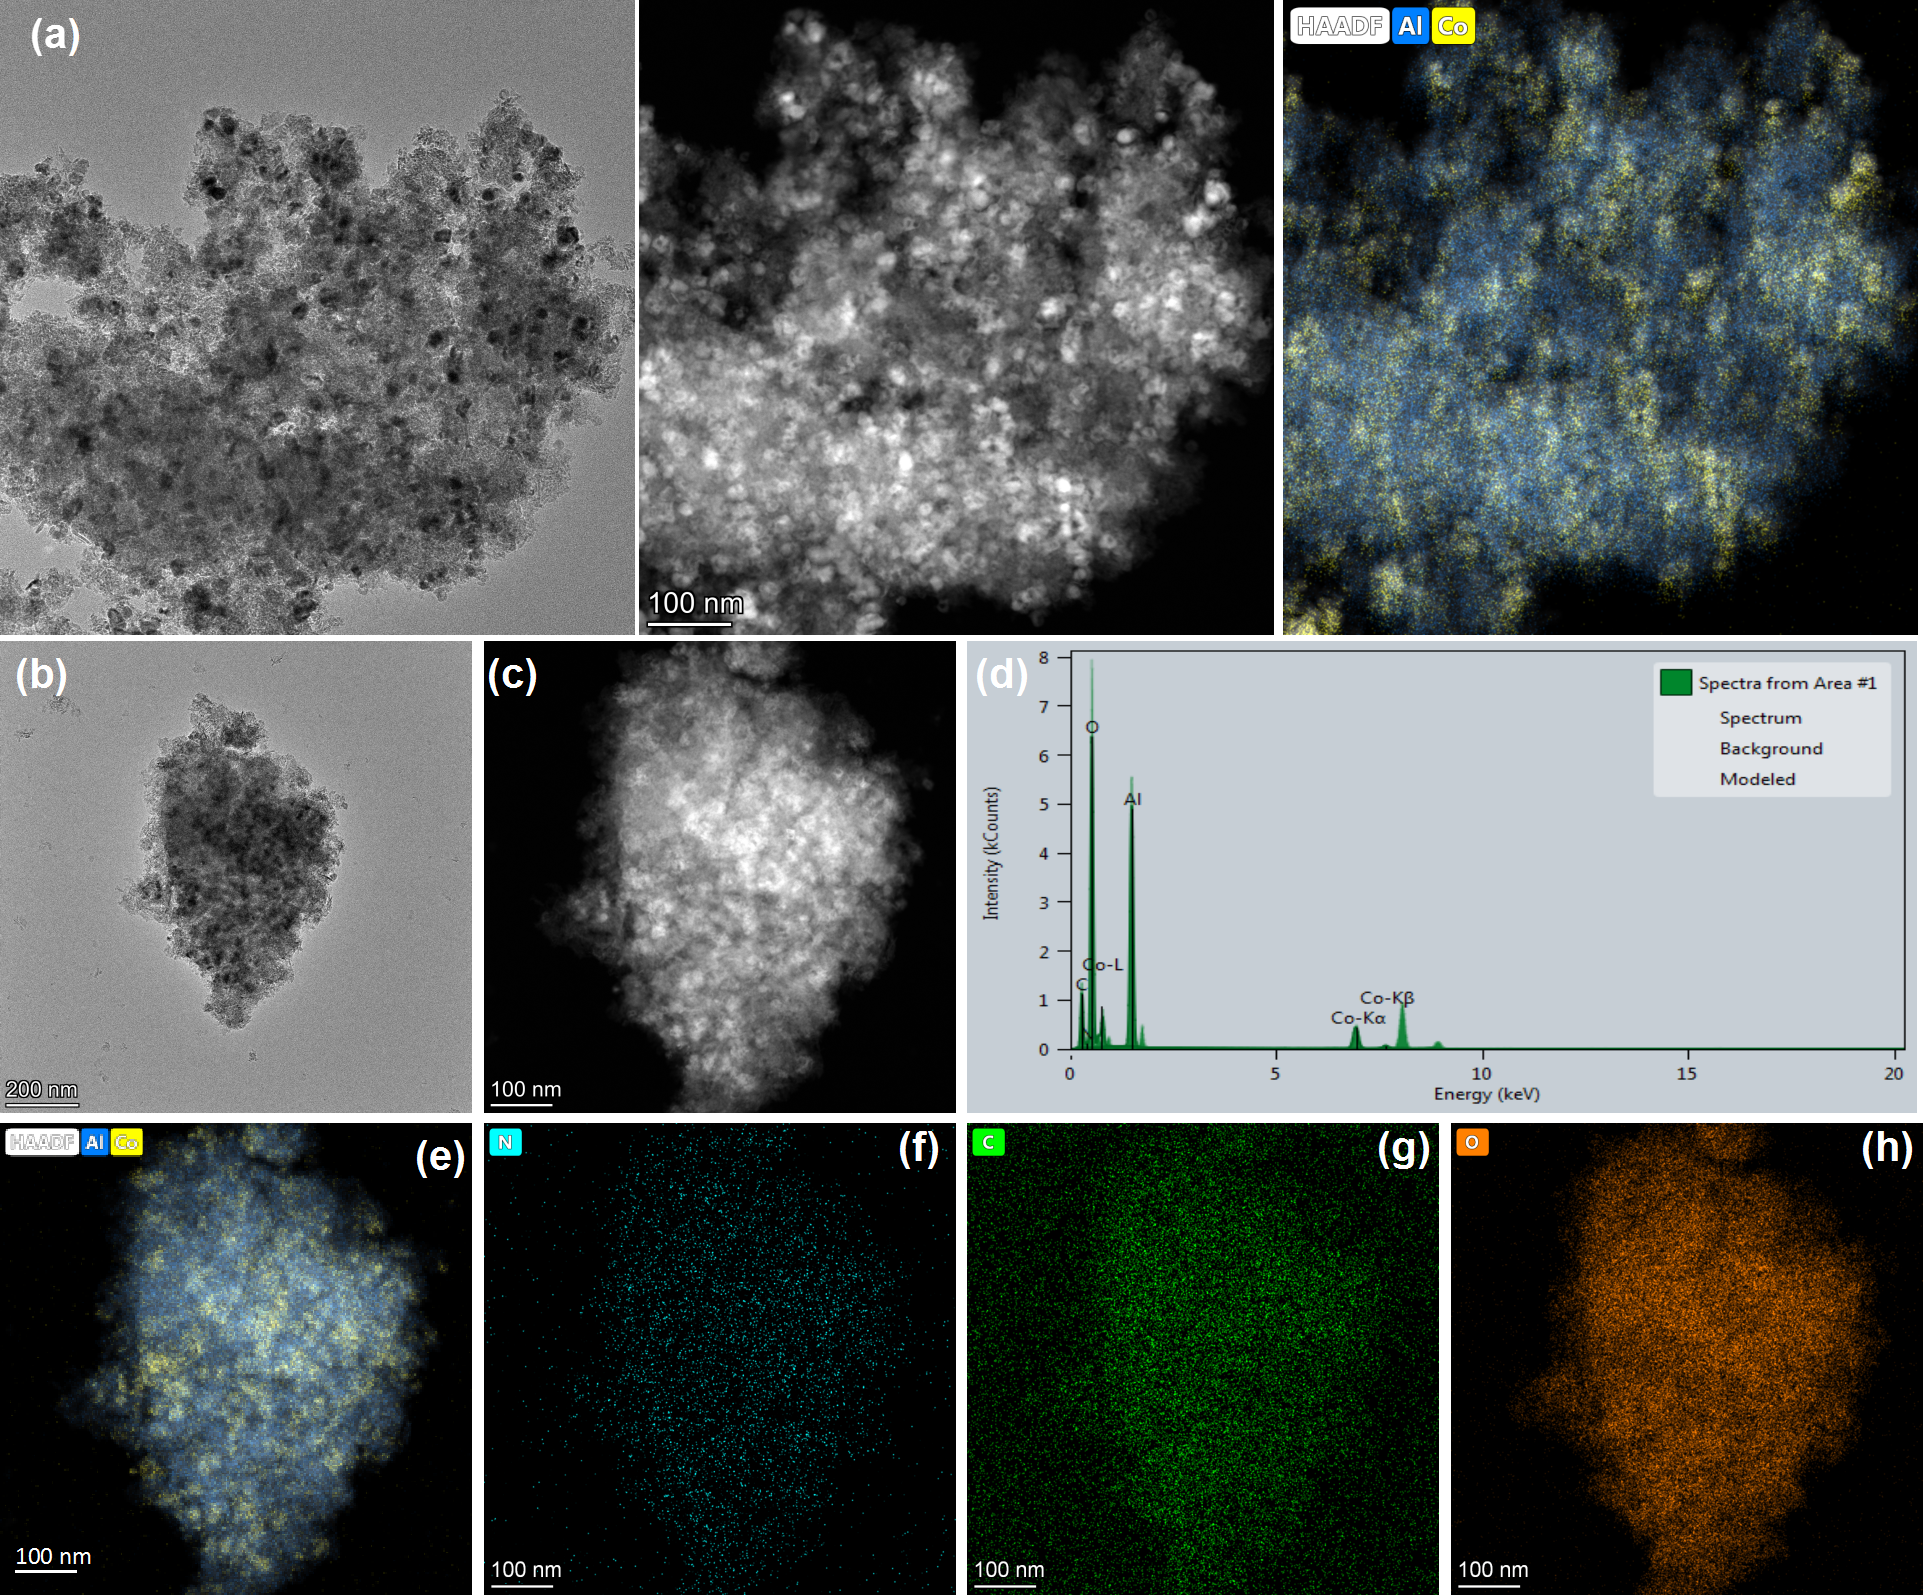


**Fig. S3** **a** The reduced Co/Al2O3 catalyst. The spent Co/NC-Al2O3 catalyst: **b** Representative bright-field TEM image. **c** Representative high-angle annular dark-field TEM image. **d** the corresponding ED spectrum. **e** Elemental mapping of Co and Al. **f** Elemental mapping of N. **g** Elemental mapping of C. **h** Elemental mapping of O


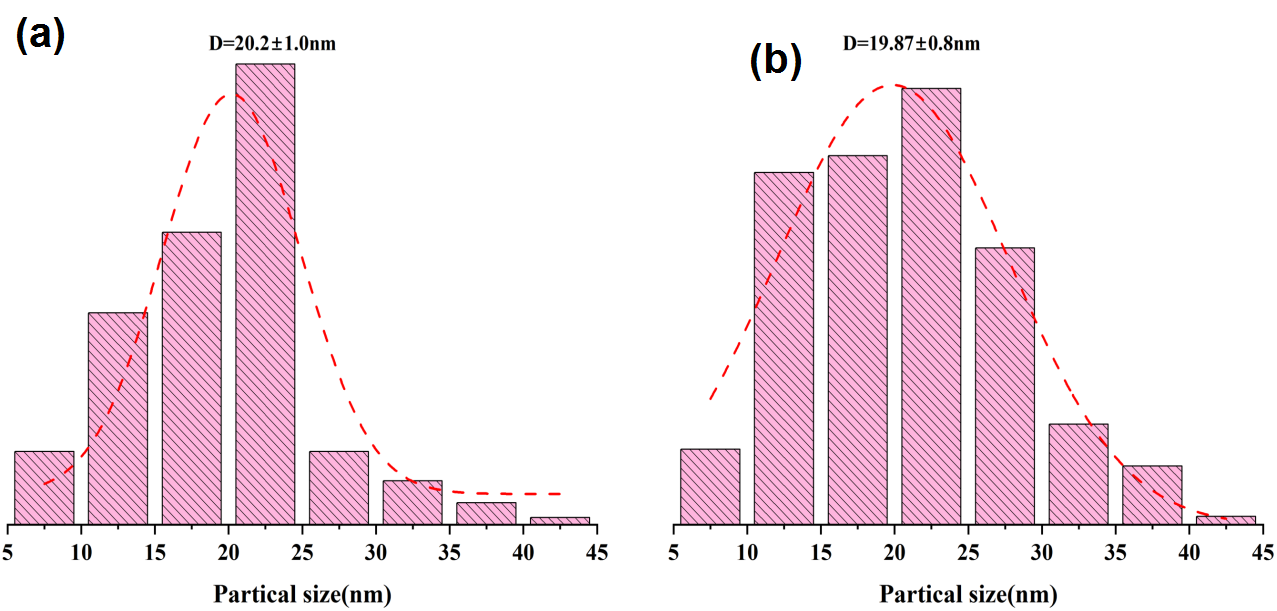


**Fig. S4** Co Particle size. **a** the reduced Co/Al2O3 catalyst. **b** the reduced Co/NC-Al2O3 catalyst

**
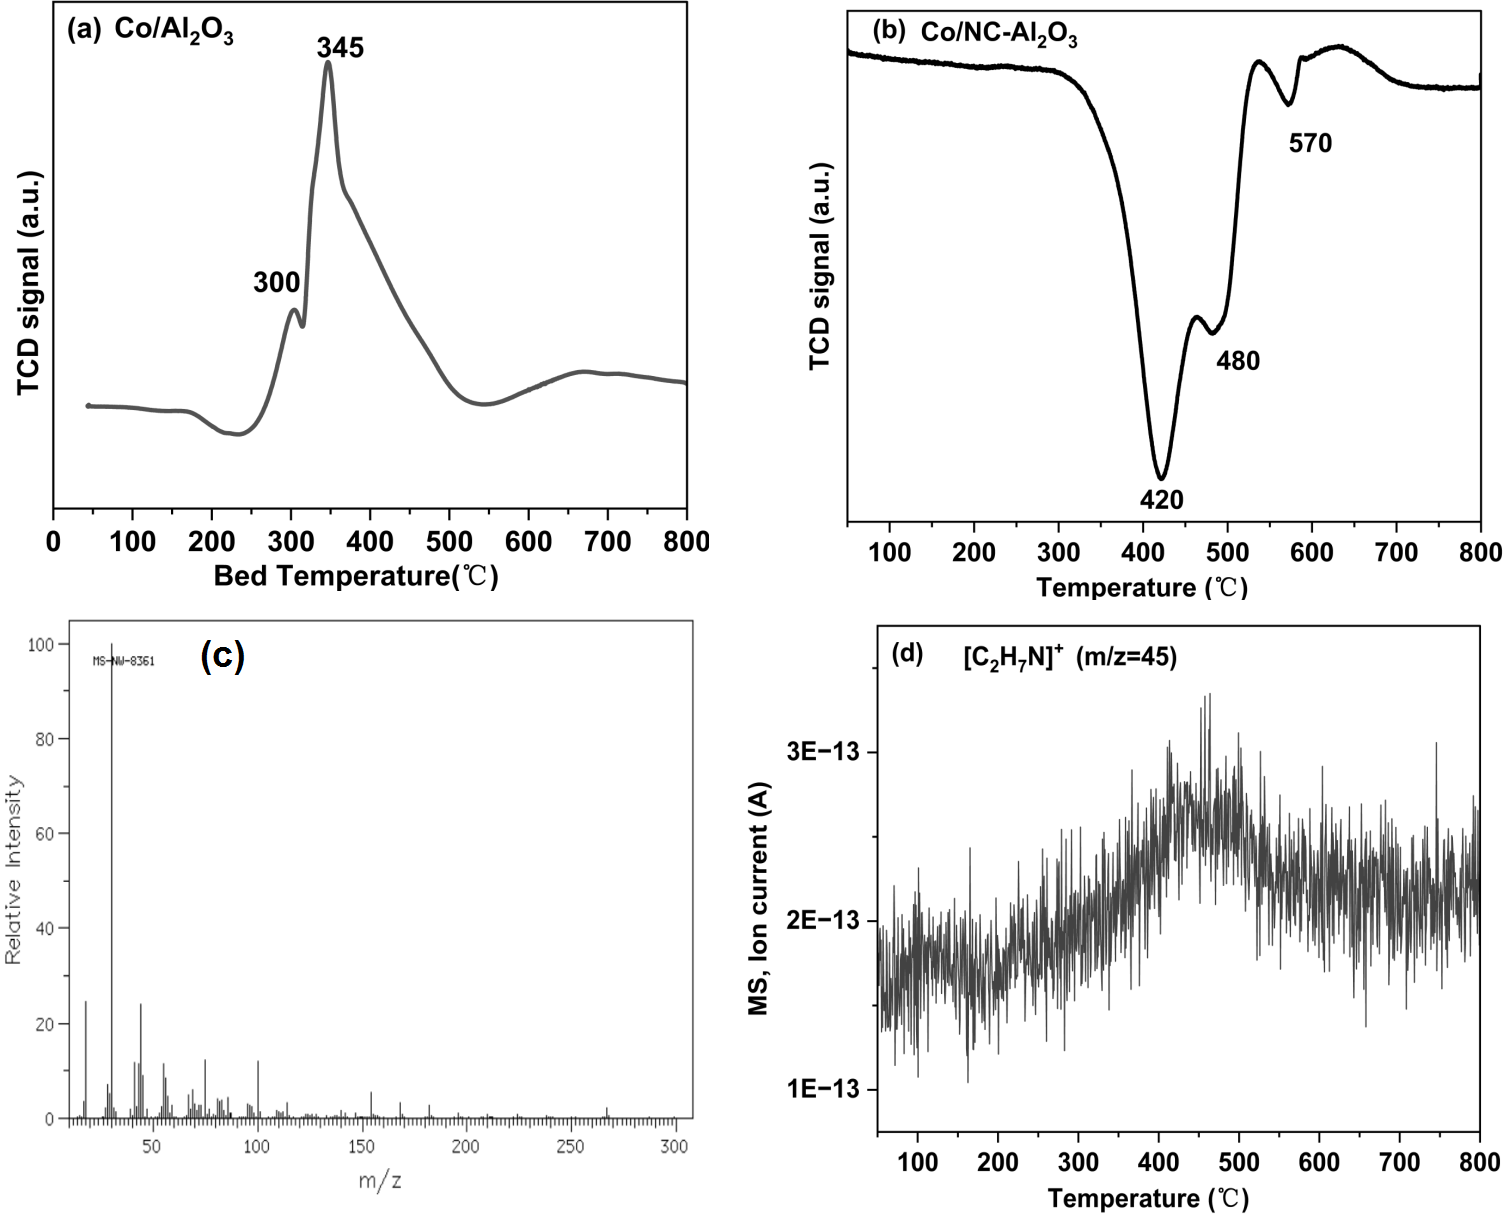
**

**Fig. S5** H2-TPR profiles. **a** Co/Al2O3 catalyst. **b** Co/NC-Al2O3 catalyst. **c** Mass spectrometric signal peaks of oleylamine molecules. **d** MS profiles of [C2H7N]+.


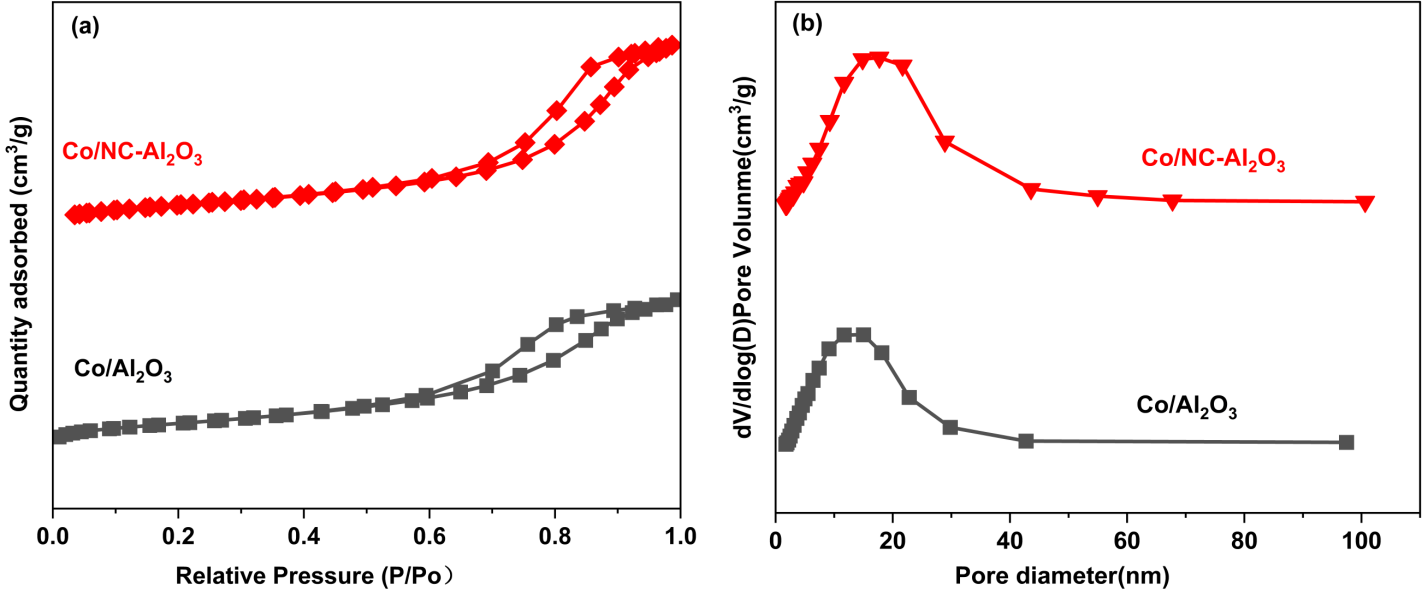


**Fig. S6** Nitrogen physics adsorption-desorption of the catalysts: **a** adsorption-desorption isotherms. **b** pore size distribution


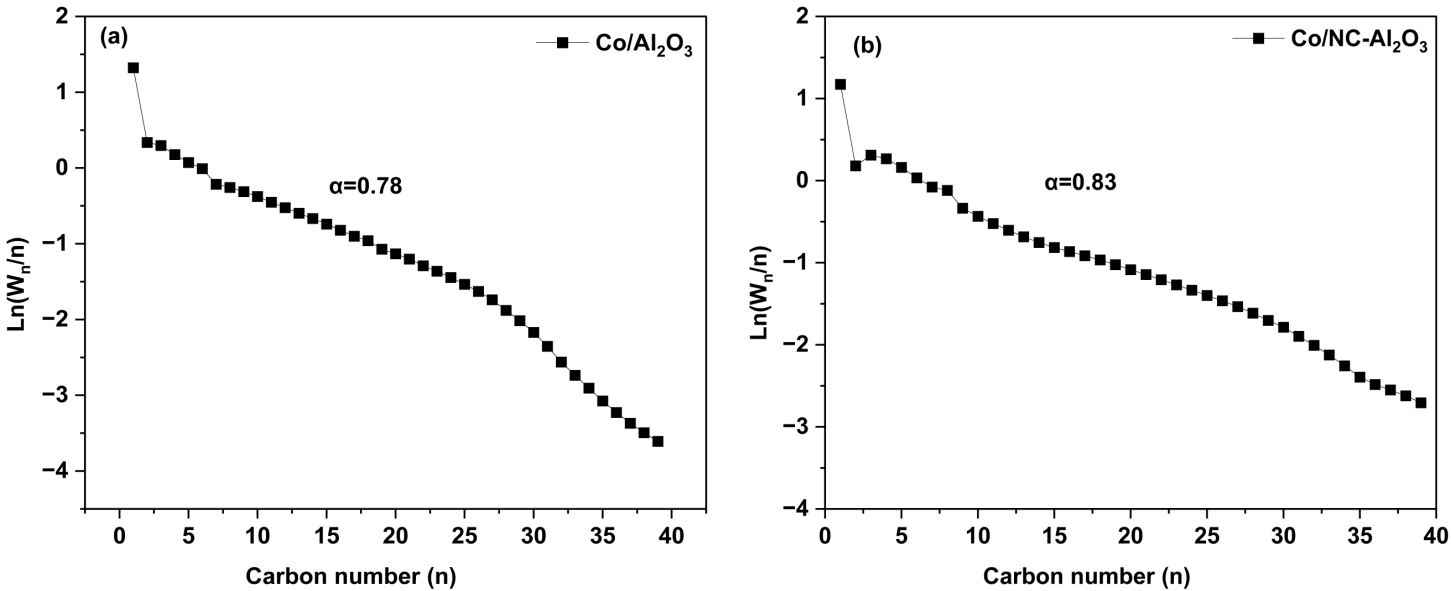


**Fig. S7** ASF product distribution curves and chain growth factor (α value) of the catalysts

**
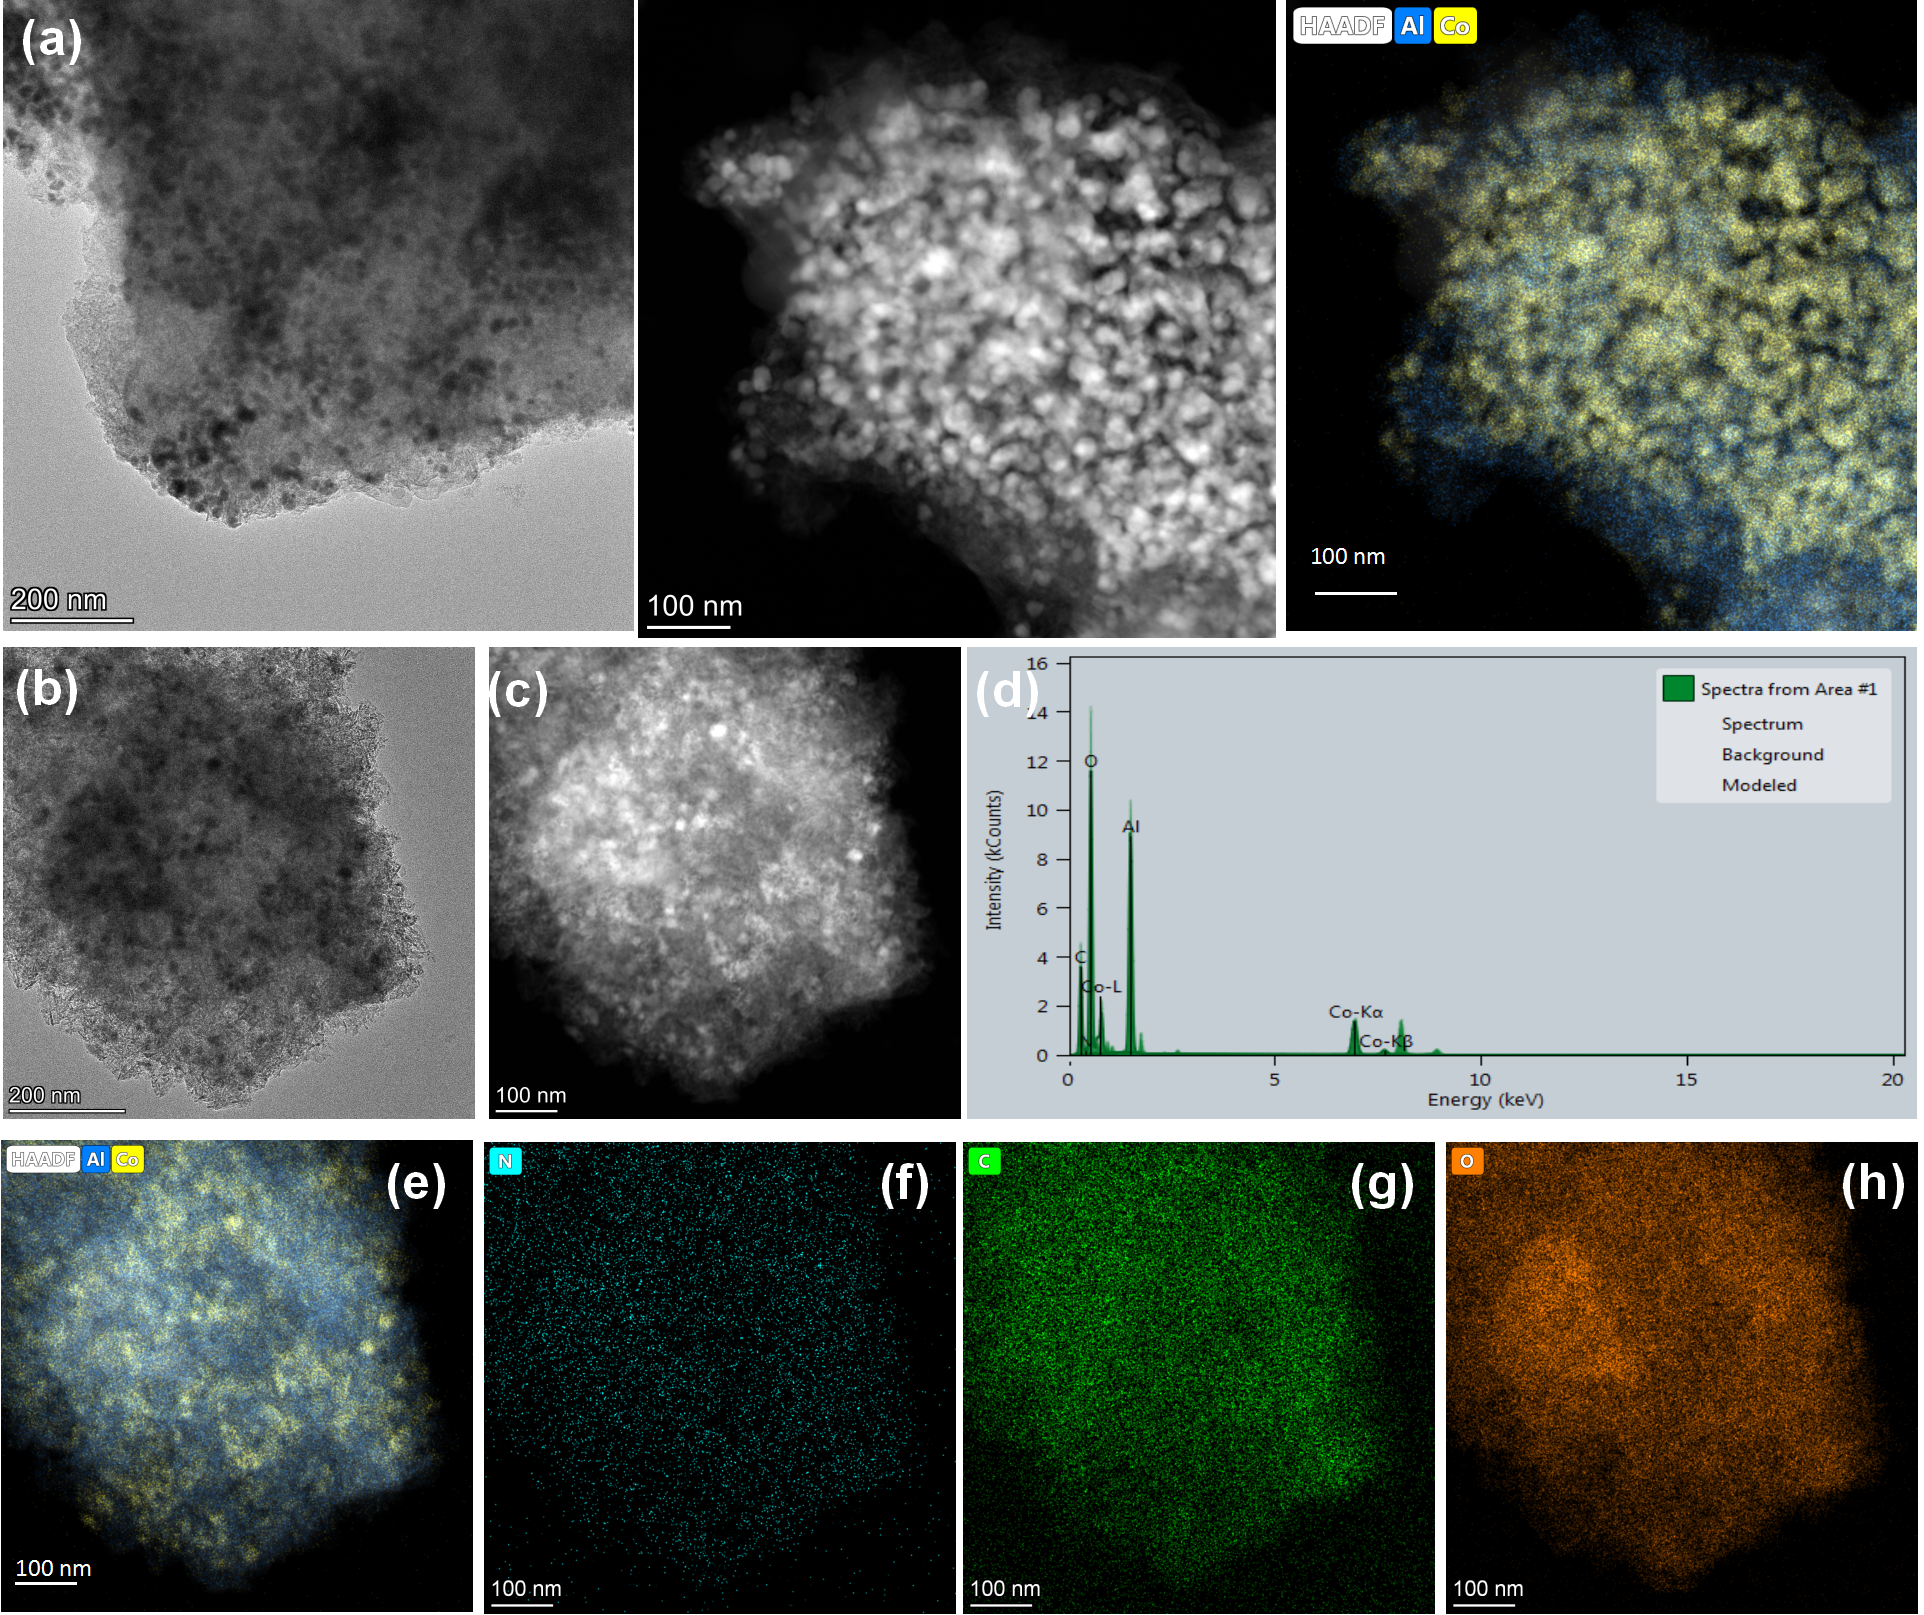
**

**Fig. S8** **a** The spent Co/Al2O3 catalyst. The spent Co/NC-Al2O3 catalyst: **b** Representative bright-field TEM image. **c** Representative high-angle annular dark-field TEM image. **d** the corresponding ED spectrum. **e** Elemental mapping of Co and Al. **f** Elemental mapping of N. **g** Elemental mapping of C. **h** Elemental mapping of O

**Table S1** Elemental surface compositions of the reduced catalysts by XPS

| Catalysts | Co (atomic %) | O (atomic %) | C (atomic %) | N (atomic %) |
| --- | --- | --- | --- | --- |
| Co/NC-Al2O3 | 5.14 | 67.63 | 26.50 | 0.73 |

**Table S2** Peaks of Co 2p3/2 binding energy position and percentage of cobalt in each valence state of the catalysts after reduction

| Catalysts | Co 2p3/2 Binding Energy (eV) | | |  | Percentage (%) | | |
| --- | --- | --- | --- | --- | --- | --- | --- |
| Co2+ | Co3+ | Co0 |  | Co2+ | Co3+ | Co0 |
| Co/Al2O3 | 782.7 | 781.3 | 780.4 |  | 0.41 | 0.23 | 0.33 |
| Co/NC-Al2O3 | 782.7 | 781.0 | 779.5 |  | 0.47 | 0.35 | 0.17 |

**Table S3** Quantitative distribution of nitrogen species in the catalysts after reduction

| Catalysts | Reduction (%) | | | |
| --- | --- | --- | --- | --- |
| Pyridinic N | Co-N | Pyrrolic N | Graphitic N | |
| Co/NC-Al2O3 | 15.9 | 22.1 | 33.7 | 28.4 | |

**Table S4** Pore structure parameters of the catalysts

| Catalyst | Surface area (m2/g) | Pore volume (cm3/g) | Average pore size (nm) |
| --- | --- | --- | --- |
| Co/Al2O3 | 254.6 | 0.5 | 8.1 |
| Co/NC-Al2O3 | 246.0 | 0.6 | 10.3 |

**Table S5** CO adsorption of catalysts

| Catalysts | Total CO adsorption (µmol/g) |
| --- | --- |
| Co/Al2O3 | 553.2 |
| Co/NC-Al2O3 | 1115.8 |

**Table S6** Comparison of catalytic performances with the typical Co-based FTS catalysts published in references for olefins

| Catalyst | T  (℃) | P  (MPa) | H2/CO | WHSV (L/gcat./h) | CO Conve.  (%) | Product Selectivity (%) | | | |
| --- | --- | --- | --- | --- | --- | --- | --- | --- | --- |
| CO2 | CH4 | C1  (CO2+CH4) | Olefins | |
| Co1Mn3-Na2S[1] | 240 | 0.1 | 2 | - | 0.8 | 17 | 20.0 | - | 54.0 | |
| Co/SiO2-1Na[2] | 250 | 0.1 | 2 | 2.0 | 2.8 | 10.2 | - | - | 27.6 | |
| 1.0PrCoRu/AOmM[3] | 200 | 2.0 | 2 | 5.1-11.0 | 20.0-23.0 | 8.4 | 9.3 | 31.7 | 31.7 | |
| Co-MnOx-(C)/SiO2[4] | 210 | 1.0 | 2 | 4.8 | 47.7 | 9 | 10.0 | 31.8 | 50.1 | |
| [Co@Co](mailto:Co@Co2C" \o "mailto:Co@Co2C)[2](mailto:Co@Co2C" \o "mailto:Co@Co2C)[C](mailto:Co@Co2C" \o "mailto:Co@Co2C)[5] | 220 | 3.0 | 2 | 2.0 | 29.1 | 8.1 | 10.5 | 38.5 | 38.5 | |
| CoMn[6] | 250 | 0.1 | 2 | 2.0 | 31.8 | 2.6 | 49.9 | - | 32.0 | |
| Co/NC-Al2O3  (this work) | 230 | 2.0 | 2 | 6.0 | 20.3 | 8.9 | 9.8 | 34.4 | 34.4 | |

**Notes and references：**

1. Zhuo O, Yang L, Gao F et al (2019) Stabilizing the active phase of iron-based Fischer-Tropsch catalysts for lower olefins: mechanism and strategy. Chem. Sci 10(24):6083-6090. https://doi.org/10.1039/c9sc01210a

2. Dai Y, Yu F, Li Z et al (2017) Effect of Sodium on the Structure-Performance Relationship of Co/SiO2 for Fischer-Tropsch Synthesis. Chin J Chem 35(6):918-926. https://doi.org/10.1002/cjoc.201600748

3. Jeske K, Kizilkaya AC, López-Luque I et al (2021) Design of cobalt Fischer-Tropsch catalysts for the combined production of liquid fuels and olefin chemicals from hydrogen-rich syngas. ACS Catal 11(8):4784-4798. https://doi.org/10.1021/acscatal.0c05027

4. Zhu M-L, Liu X, Niu Y et al (2024) Long-chain α-olefins production over Co-MnOx catalyst with optimized interface. Appl Catal B 346:123783. https://doi.org/10.1016/j.apcatb.2024.123783

5. Zhao Z, Lu W, Yang R et al (2018) Insight into the formation of Co@Co2C catalysts for direct synthesis of higher alcohols and olefins from syngas. ACS Catal 8(1):228-241. https://doi.org/10.1021/acscatal.7b02403

6. Lu J, Yang L, Xu B, Wu Q et al (2014) Promotion effects of nitrogen doping into carbon nanotubes on supported iron Fischer-Tropsch catalysts for lower olefins. ACS Catal 4(2):613-621. https://doi.org/10.1021/cs400931z
